# Supplementary material
Source: publisher figshare collection journal article supplement (https://tandf.figshare.com/ndownloader/files/13001378)
Supplement: Supplementary file 1 [file 13001378]

## **SUPPLEMENTAL DATA**

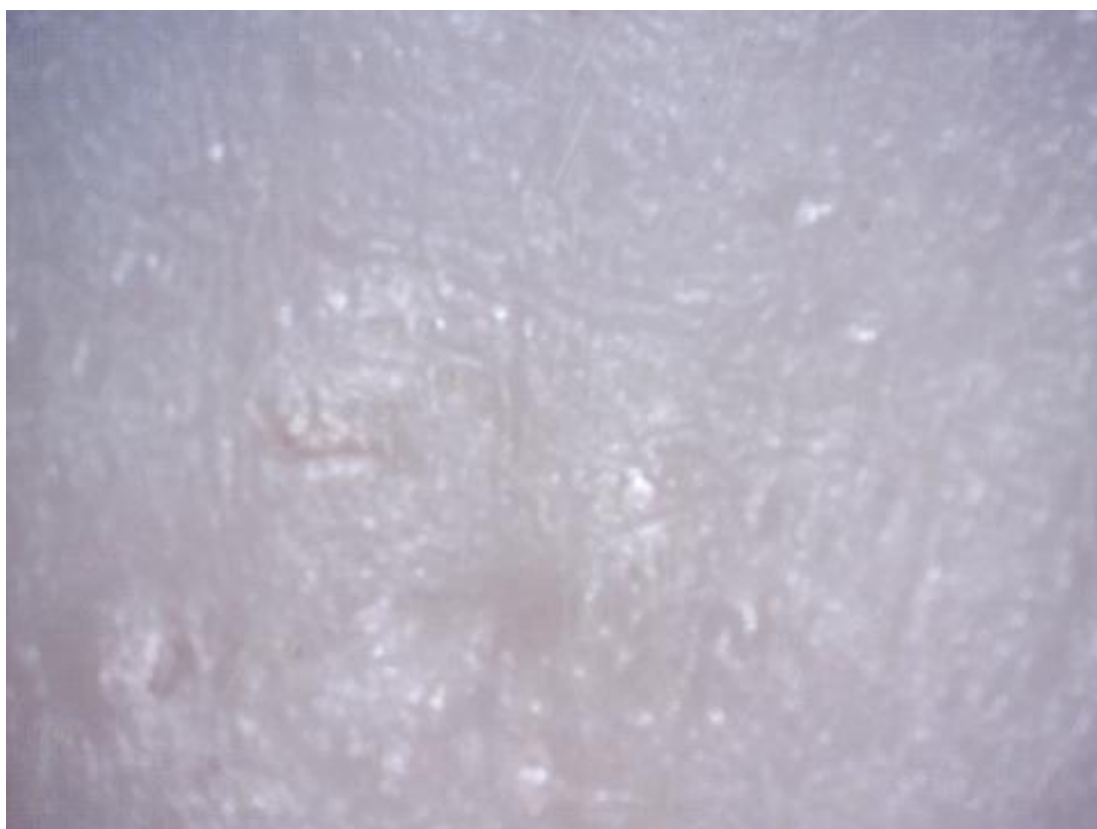

**Figure S1.** Rabbit skin before the application of transdermal patch.

### **Construction of Standard Calibration Curve of Tizanidine Hydrochloride**

Stock solution method was used to construct the calibration curve of Tizanidine Hydrochloride. For this purpose, 100 mg of Tizanidine Hydrochloride was dissolved in small quantity of phosphate buffer saline of pH 7.4. The solution was transferred to volumetric flask and final volume was made up to 100ml by using PBS pH 7.4 to get stock solution A 1000 $\mu$ g/ml. By using

micro pipette, 222 $\mu$ l of stock solution was taken in test tube and mixed with 9778 $\mu$ l of phosphate buffer saline pH 7.4 to get stock solution B (22.2 $\mu$ g/ml). From the stock solution B further serial dilutions were prepared by using phosphate buffer saline pH 7.4. Thus dilutions of strength 11.1, 5.5, 2.78, 1.37, 0.68, and 0.34 $\mu$ g/ml was prepared (Table S1). The sample from each dilution was taken and analyzed by using UV-spectrophotometer at 319nm.

**Table S1.** Dilutions of Tizanidine Hydrochloride in Hydrochloride in PBS pH 7.4.

| Sr. No. | Tizanidine Hydrochloride Concentration ( $\mu$ g/ml) |
|---------|------------------------------------------------------|
| 1       | 100                                                  |
| 2       | 22.2                                                 |
| 3       | 11.11                                                |
| 4       | 5.5                                                  |
| 5       | 2.75                                                 |
| 6       | 1.37                                                 |
| 7       | 0.68                                                 |
